# Supplementary material
Source: ML conference proceedings conference paper supplement (https://openreview.net/forum?id=3X6QlkWfHH)
Supplement: supplementary_material [file attachment]

**STANPUMP User's Manual**

April 29, 1998

**Overview:**

STANPUMP is a computer program which drives an infusion pump to administer anesthetic drugs according to a three compartment pharmacokinetic model. STANPUMP is available, at no charge, to interested investigators and anesthesiologists. You may share the STANPUMP software with any interested persons. My only request is that any manuscripts based upon work with STANPUMP acknowledge, either in the Methods or following the Discussion, the source of STANPUMP with a statement to the effect that STANPUMP is freely available from the author, Steven L. Shafer, M.D., Anesthesiology Service (112A), PAVAMC, 3801 Miranda Ave., Palo Alto, CA. 94304. Please only include the above reference on *published manuscripts* as space on abstracts is too precious to waste any on an acknowledgment!

STANPUMP can be instructed to maintain a steady concentration in either the plasma or at the site of drug effect (i.e. the effect site or biophase). STANPUMP can also be used to administer conventional zero-order infusions. STANPUMP has a simulation mode which allows simulations of virtually any desired infusion regimen, including boluses, constant rate infusions, and infusions to achieve pseudo steady-state in the either the plasma or at the site of drug effect.

STANPUMP runs on any IBM PC compatible computer. Versions of STANPUMP prior to April, 1990 could not run in the effect mode without at least an 8087 math coprocessor or an 80286 computer. This has now been changed, and STANPUMP will run satisfactorily in the effect mode on any IBM PC compatible computer.

Ira Rampil has been kind enough to port STANPUMP to the Macintosh in native MAC code (rather than require Soft-PC to emulate a PC). The program looks the same as the DOS version, and thus lacks the warm and fuzzy characteristics of MAC programs. However, it works and even drives the serial ports. The function keys are replaced by the option key + a number (e.g., "Fn 1 is accessed by hitting Opt+1 as a pair. The End Key is simply lower case 'e'.

STANPUMP will support delivery of drugs over extended periods of time. STANPUMP has infused drug for sedation in our ICU for periods in excess of 2 weeks. STANPUMP will stop saving data to the disk and internally if it runs out of space, but this should not affect the clinical performance of the pump. Thus, there is no upper limit to how long STANPUMP can infuse drugs to a patient.

Pierre Maitre, M.D. and I have implemented Bayesian forecasting in the most recent version of STANPUMP. The use of Bayesian forecasting with STANPUMP is discussed in a separate section below.

STANPUMP can run in simulation modes, or it can control an infusion pump directly over a serial interface. When STANPUMP directly controls an infusion pump, STANPUMP becomes a medical device. As such, it should be used only under the auspices of an appropriate institutional review board as part of an approved experimental protocol.

STANPUMP primarily supports the Harvard Pump 22. The pump costs about $1800 and is an extremely accurate research pump. While the Harvard Pump 22 is not approved for human use, it has been my experience that clinical engineering departments are happy to approve it for use within a research protocol. Harvard Apparatus can be reached at 508-655-7000 or 800-272-2775. You should ask for Diane Gargano, who is familiar with this application.

The Harvard Pump 22 has no battery. Thus, if the Harvard Pump 22 is momentarily disconnected from AC power during a case the pump will lose it's internal memory. STANPUMP constantly checks the pump for the volume infused during each update cycle. When the Harvard Pump 22 loses the contents of its internal memory, STANPUMP computes what the volume infused should have been, and restarts the Harvard Pump 22.

STANPUMP has recently incorporated a driver for the GRASEBY 3400 pump. This pump is not accurate at low infusion rates. At low rates, the Graseby 3400 infuses significantly LESS than it internally calculates. There is no way for the STANPUMP program to correct for this internal error. Users of the Graseby 3400 pump are advised to regularly compare the quantity of drug delivered, as reported on the screen of the STANPUMP program, with the actually amount of drug delivered, based on the syringe volume itself. If these quantities differ, then the predicted concentration maintained by STANPUMP will have an additional source of error.

STANPUMP is easy to operate. To run the program, just copy it into whatever directory you intend to use, and type "STANPUMP." Then, answer the questions put forward by the program. You may find yourself confronted with a choice of pharmacokinetic data sets for any given drug. Most of the kinetic sets will give reasonable performance. I have my own preferences, but would prefer to not make global recommendations on specific kinetic sets.

Lastly, you can always get the most recent update of STANPUMP from the WWW at:

http://pkpd.icon.palo-alto.med.va.gov. There you will find the current copy of both the source and object code. An updated version is added every 3-4 months.

**Installation of STANPUMP**

To install the program, simply place the diskette in your A drive and type Install. Install simply creates a directory on your C drive called “STANPUMP” and copies the diskette files to that directory. See suggestions below if you wish to run STANPUMP under Windows. In general, we do not recommend running STANPUMP under Windows when it is actually administering drug to patients. Technically it is possible to run STANPUMP under Windows, and we have made considerable effort to make STANPUMP itself robust under Windows. Nevertheless, the Windows environment is not well suited to real-time “mission critical” applications because of the instability of the operating system itself.

**Running STANPUMP**

To run STANPUMP, simple enter the directory where STANPUMP is saved, and type "STANPUMP." The program will ask for the following data:

1. Common identifying information: STANPUMP will ask for the subject identifier (name, medical record number, or whatever), the subject’s weight (in kg), height (in cm), age (years), and gender (m/f). From these data it will calculate the body surface area and lean body mass. These parameters are all stored in a file that ends with the extension .pk. The data are stored both to recreate STANPUMP runs and to serve as a record of subject covariates for subsequent pharmacokinetic and pharmacodynamic analysis. The program also asks “Who are you?” so the data analyst knows who to call if there are questions about a particular study.

2. Drug selection: You will be given a list from which you must select on of the available drugs. You also have the option of creating an external parameter file (Appendix III), and loading in the drug data from that file.

For each individual drug, there may be a choice of pharmacokinetic parameters. Depending on the pharmacokinetic parameter set chosen, you may also be asked about the patient's age, height, or gender.

3. The initial mode (target or bolus/infusion mode). In target mode, the program will infuse however much drug is required to maintain a desired target in either the plasma or at the site of drug effect. In bolus/infusion mode, you set the dose by selecting a bolus amount or entering an infusion rate. These modes can be toggled when the program is operating. Items 4 and 5 below are skipped if you select bolus/infusion mode.

4. Target (plasma or effect site, or drug effect): If the equilibration rate constant, ke0, is known, then the program will ask whether you wish to target the plasma or the site of drug effect. If a full effect site model has been described (currently implemented for muscle relaxants), then the program will also give you an option of targeting the effect itself.

5. Target concentration or effect: This is the initial target the program will attempt to achieve. If you have selected plasma or effect site, then you should enter the desired target concentration. If you have selected the effect itself, then you should enter the desired effect you wish to target. You cannot target the maximum effect, because the concentration associated with the maximum effect is ¥.

6. Confirmation: STANPUMP will display your choices, as well as the default infusate concentration, and ask for a confirmation of the data.

7. STANPUMP will ask for the name of the file to store the output data. The output files are discussed in Appendix II. Only the first 8 characters of the name will be accepted, and any extension (e.g. ".dat.") will be ignored. STANPUMP will automatically create the extensions for the file names.

8. STANPUMP will ask for the name of the infusion pump. Select "simulation" to run with no pump attached.

9. If the Harvard Pump 22 has been selected, STANPUMP will ask for the syringe type, and then enter a dialogue to purge the syringe and tubing after it has been placed in the pump.

10. Once all questions have been answered, STANPUMP will display a start-up screen, awaiting the keypress "1" to actually start the infusion. Thus, all the questions can be answered well before actually beginning a STANPUMP infusion.

11. STANPUMP has several built in clinical trial protocols, which are triggered by command line arguments. For example, the word "ICI" on the command line triggers a specific series of questions relevant to specific protocols, and that some of the queries shown above will be bypassed. A review of the command line arguments (Appendix I) will demonstrate that many aspects of STANPUMP's performance can be altered through the use of command line arguments.

## STANPUMP under Windows 95/98

STANPUMP can be run under Windows 95 and 98. To do this, you should start up the PC in DOS mode. This can usually be done simply by pressing F8 shortly after the PC has identified the disk drives, *before* it starts loading up Windows. This usually will bring up a menu allowing you to start directly in DOS.

You can also run DOS by *restarting* Windows in DOS mode. If you do this, Windows will close the serial communications port, and connection will not be possible. To do this, change the setting "EnablePowerManagement" from 01 00 00 00 to 00 00 00 00. The EnablePowerManagement setting can be found in :

Hkey_Local_Machine\System\CurrentControlSet\Services\VxD\VCOMM.

This should fix the problem (or so I’ve been told).

Others have recommended the following changes to the system.ini file as follows:

[386Enh]

.

.

.

;device=*vcd

.

.

.

;THE FOLLOWING LINES ADDED ON INSTALLING STANPUMP.

;NOTE DEVICE=*VCD ABOVE IS DISABLED

;VGFCD.386 NEEDS TO BE DISABLED OR SP WILL NOT RUN UNDER WIN98

;

device=c:\sedation\vgfd.386

;device=c:\sedation\vgfcd.386

GfMaxDosComPorts=4

GfMaxDosBuffPages=1

;

;END OF STANPUMP INSTALLATION CHANGES

**Control of the STANPUMP program**

Once the infusion has started, the operation of STANPUMP is controlled by special function keys, as follows:

F1 Change desired concentration

F2 Change wake-up concentration

F3 Change syringe

F4 Enter measured plasma concentration

F5 Toggle real time and maximum speed simulations

F6 Toggle target and zero order infusion modes

F8 Toggle plasma and effect modes

F9 Toggle transport mode

F10 Terminate infusion

Detailed description:

**F1** will allow you to enter a new desired concentration. This will be the desired concentration in either the plasma or at the site of drug effect, depending on which mode you are operating in. The display will indicate which mode you are in, by showing the desired concentration opposite "plasma" or "effect site", respectively. The pump will continue infusing to the desired concentration while you are entering the number. There is no time limit on entry of the number, so you can enter the desired concentration for an upcoming time point, and leave it there until the moment you desire the change. The pump responds immediately to a change in the desired concentration when the "enter" key is pressed. If no number is entered, the desired concentration will remain unchanged.

**F2** will change the "look ahead" concentration. The pump constantly calculates the time required to drop to this concentration, assuming that the infusion is terminated at the present time (i.e. the desired concentration set to 0). This allows you to look ahead and see the amount of time required to achieve the wake up concentration if the infusion was immediately discontinued. Usually, the wake-up concentration will be the concentration desired for awakening the patient at the conclusion of the anesthetic, hence the term "look ahead" concentration. However, you can use this to predict the fall to any concentration you are interested in. If you press F2, and then press "enter" without entering a number, the "wake-up" concentration will remain unchanged.

**F3** allows you to change the syringe. This has only been implemented for the Harvard Pump 22. Changing the syringe includes a dialogue for computer controlled purging of the syringe, to eliminate any air or dead space in the tubing or mechanism. The syringe size may be changed when the syringe is changed.

**F4** allows entry of measured plasma levels for Bayesian forecasting. The F4 key only appears on the menu when using a data set for which Bayesian forecasting is implemented. Currently, this is limited to alfentanil (Maitre kinetics) and lidocaine (Vozeh kinetics). After pressing F4, enter the time of the measurement, followed by the measured concentration. While Bayesian forecasting is in progress, entering F4 will abort the Bayesian forecasting. The last measurement will be deleted from the list of measurements as well.

**F5** allows toggling the simulation speed between real time and the maximum speed of the computing hardware. Using F5, one can simulate the induction of anesthesia, then jump ahead to simulate the emergence. Also, one can use F5 to simulate the results of a very long (multi-day) infusion with STANPUMP. F5 will not appear in the menu unless STANPUMP is in simulation mode.

**F6** toggles the pump between target mode (the default) and a zero-order infusion mode in which the pump administers boluses and continuous, constant rate infusions. The mode is primarily offered to permit users to perform simulations with STANPUMP.

**F8** toggles the pump between targeting the plasma concentration, targeting the effect site concentration, and targeting the effect itself (provided a full effect model is programmed into the computer). STANPUMP can be toggled between modes at any time.

**F9** instructs the pump to enter "transport mode." This allows the pump to be disconnected from the computer for transport (without electricity) to another site. This mode is necessary because the Harvard Pump 22 has no battery, and some of our studies involve using the pump in the O.R., then maintaining the infusion in the Intensive Care Unit. The desired concentration is set to 0 when in transport mode. If the pump is in transport mode, then F9 instructs the pump to resume serial communications. This will include the full change syringe/purging dialogue for the Harvard Pump 22, and include entering a new desired concentration.

**F10** terminates the infusion. After pressing F10, the pump will prompt you to either press "END" (on the numeric keypad) to actually implement the termination or press F1 to return to normal pump function. The pump will continue to function while you decide which button to press. The second step (pressing END) was added after I inadvertently pressed F10 during a case, terminating the infusion well before I intended to do so.

Lastly, Control-C, Control-Break, and Control-Alt-Delete will not terminate the program once an infusion has started. These keys have been specifically disabled to prevent inadvertent termination of the infusion. You must use F10, as described above, to exit the STANPUMP program.

I suggest running the pump in simulation mode prior to clinical use. Select the drug and the pharmacokinetic parameter set you wish to infuse, then observe the rate and amount of drug administered by STANPUMP. Experiment with the differences between "plasma mode" and "effect mode." You will probably observe that the effect mode more closely approximates how you would induce the anesthetic if you were giving the drug without benefit of a computer controlled infusion.

**Practical Suggestions**

1. Connect the infusion line to a t-piece immediately proximal to the I.V. catheter. This way, there is very little dead space between the infusion line and the patient. You would never attach a nitroprusside infusion line to the carrier line 5 feet away from the patient, and the same rationale applies when administering intravenous anesthetics.

2. Place a stopcock between the syringe and the infusion tubing. In the unlikely event that a runaway infusion occurs, the fastest way to stop the pump is to just turn the stopcock. Also, the stopcock is useful for drawing up additional drug, which needs to be regularly done if infusing propofol. Purging the line, while still connected to the patient, is also simplified by the presence of the stopcock.

3. Double check the syringe size. There are many internal checks within the STANPUMP program to prevent patients from receiving an overdose. However, STANPUMP will definitely give an overdose if you tell STANPUMP that you have put in a small diameter syringe and actually put in a large diameter syringe. Thus, use particular care when entering the syringe size into STANPUMP. STANPUMP will ask you to verify the syringe size. Please do this deliberately and carefully when you use the program.

4. STANPUMP under Windows 3.1. We have recently changed STANPUMP from using polled serial communications to using the Greenleaf Serial Communications drivers. The new serial drivers are interrupt-driven, which makes them considerably more reliable than the previous polled method. Additionally, using the included Greenleaf virtual device drivers, STANPUMP should operate reliably under Windows 3.1, even as a background operation (provided background processing of the DOS window has been enabled).

To run under Windows, you need to include the following lines in your [386Enh] section of the file “system.ini” located in your windows directory:

device=c:\stanpump\vgfd.386

device=c:\stanpump\vgfcd.386

The files vgfd.386 and vgfcd.386 are on the STANPUMP diskette, and are copied into the STANPUMP directory as part of the typical installation. The above assumes that the files vgfd.386 and vgfcd.386 are located in a directory “stanpump” located on your c: drive. If you have put them somewhere else, then you will need to modify the above lines accordingly.

5. Control-C, Control-N, Control-P, and Shift-PrtScr. These special control characters can cause problems for many DOS programs because they are handled by the DOS keyboard interrupt. STANPUMP modifies the keyboard interrupt to screen out all control characters. Thus, you cannot use Control-C to abort the program. You also cannot send the screen contents to the printer with Control-N or Control-P. This avoids the lock-up which occurs if you inadvertently type Control-N or Control-P when there is no printer attached to the computer. If you want to abort STANPUMP prior to starting the infusion, press ESC (there is a reminder on the screen to this effect). Once the program has started, use F10 to abort STANPUMP. If STANPUMP should abort spontaneously by some other mechanism, you should immediately reboot the computer, as the keyboard interrupt will probably be corrupted.

6. 80837 Coprocessor: Every mathematics coprocessor is not necessarily compatible with every implementation of the 80386 CPU. For example, the Everex Tempo laptop computers use a Chips and Technologies 80386 ChipSet which is not compatible with most Cyrix math coprocessors. This will show up as error M1116 when STANPUMP is run. If you choose to install a math coprocessor on your computer (which is a good idea), please run the diagnostic disk shipped with the coprocessor to verify that the coprocessor is compatible with your 80386 prior to using STANPUMP (or any other program).

7. STANPUMP uses the software clock maintained by DOS. The Gateway Handbook computer evidently does not increment the clock correctly when power-saving mode is enabled. It would appear that time goes backward (!) every minute under power-saving mode. When STANPUMP sees time going backward, it assumes that midnight has been passed, which is the only time when the clock time actually does go backward. It thus increments the day counter. On the Gateway Handbook computer, the day gets incremented every minute, which obviously causes considerable problems for STANPUMP. As nearly as I can tell, there is no software “fix” that STANPUMP can make for this problem with the clock on the Gateway Handbook. My recommendations are: 1) Do not use STANPUMP on the Gateway Handbook, and 2) do not use STANPUMP under a “Power-Saving” mode on any computer.

**Bayesian forecasting**

Pierre Maitre, M.D. and I have recently incorporated Bayesian forecasting into STANPUMP. Bayesian forecasting is currently supported for only two drugs: alfentanil (Maitre kinetics) and lidocaine (Vozeh kinetics). These two drugs were chosen because careful population pharmacokinetic analyses have been published for them, and because they tie into specific research programs.

When using Bayesian forecasting, the user measures plasma samples and then enters the results into the computer. The samples can be entered at any time after the sample has been drawn, and need not be entered in chronological order (although it makes sense to do so). The user enters the time of the sample, in minutes from the beginning of the infusion, and the measured concentration. Up to 60 observations can be entered. After each observation, STANPUMP uses nonlinear regression to estimate the individual patient's pharmacokinetic parameters. The nonlinear regression always starts with the original population estimates, and then simultaneously minimizes both the squared error between the measured and predicted concentrations, weighted by the expected variance of the measurement, and the squared error between the original and predicted pharmacokinetic parameters, weighted by the expected variance of the parameter. During and after the regression, STANPUMP displays the measured and predicted concentrations for the last 20 observations so the user can assess the goodness of fit.

The F4 function key is used to enter measured concentrations. The user first enters the time of the measurement, followed by the actual measured concentration. If the time of the measurement is before the time of a previous measurement, then the new observation will be inserted into its proper position. If the time of the measurement is the same as the time of a previous measurement, then the measured concentration of the previous measurement will be changed to the new measured concentration. If the time of the measured concentration is the same as the time of a previous measurement and the measured concentration is 0, then the previous measurement will be deleted. If several measurements are entered, and then all measurements are subsequently deleted, STANPUMP will restore the original population pharmacokinetics.

The nonlinear regression and estimation of individual patient pharmacokinetic values happens in real time, while the pump continues to administer drug into the patient. After the parameters are estimated, STANPUMP reestimates the current predicted plasma and effect site concentrations. If the plasma and target concentrations were the same at the beginning of the Bayesian update (i.e. the patient was at pseudo steady-state), then STANPUMP will revise the target concentration to agree with the new estimate. This prevents STANPUMP either giving an undesired bolus, or turning off the infusion (depending on whether the revised kinetics lowered or raised the predicted concentration, respectively) at the conclusion of the Bayesian forecasting.

Bayesian forecasting is also implemented for feedback of the percent neuromuscular blockade on the PK/PD model of muscle relaxants. The Bayesian algorithms are used to update the pharmacokinetic parameters (V1 and clearance) based on the observed effect. This is implemented for the purpose of testing the utility of real-time Bayesian forecasting based on measures of drug effect, which are often available, instead of requiring entry of measured plasma concentrations, which are rarely available.

**Cabling**

Most problems with STANPUMP have been caused by poor cabling between the pump and the computer. If the cable falls out or fails to transmit the data between the pump and the computer, there is little the software can do to correct the problem. The proper cable can be found at virtually any computer store, labeled as an "IBM AT-MODEM" cable. If the cable is screwed into the computer and the pump, this will assure that the pump is not accidentally disconnected from the computer when using STANPUMP.

As new pumps get added to STANPUMP, it may be the case that the pump requires a more specialized cable than a conventional modem cable. I will make sure that STANPUMP is programmed to use the cable recommended by the pump manufacturer. Thus, please consult with your pump owner’s manual to find a description of the cable to connect your infusion pump to STANPUMP. Additional information about RS-232 cables can be found at the following sites on the World Wide Web:

http://www.hut.fi/~then/datacom/rs232cables.html

http://www.uwsg.indiana.edu/usail/peripherals/serial/rs232/

**Safety issues**

STANPUMP is a research program, not a commercial product. As STANPUMP is an experimental program, it should only be used as part of an approved research protocol. Additionally, patients should be made aware that STANPUMP, in combination with the Harvard Pump 22, is an experimental device that is not approved for human use. I therefore recommend that the experimental nature of STANPUMP be explicitly mentioned in the informed consent.

A recent survey of users indicates that there has been only one report of an administration error causing an overdose of drug, and that was with an earlier version of STANPUMP. This happened five years ago at Stanford in the first clinical trial with STANPUMP. The overdose was caused by the software not anticipating the influence of electrocautery on the Harvard Pump 22. Electrocautery can, on rare occasions, cause the Harvard Pump to reset its internal memory and lose track of the volume already infused. STANPUMP has since been revised to recognize this problem, reinitialize the Harvard pump, and restart the infusion. Approximately 5 seconds of data are potentially lost when this error occurs. There have been no further cases of drug overdose in the four years since this problem was addressed.

Despite this excellent safety record, I recommend that the user of STANPUMP regularly check the infusion rate and total dose administered. However, I must emphasize that the response of STANPUMP to unexpected situations is to shut down the pump, rather than risking an incorrect infusion of drug.

While the nature of computer software prevents my making any guarantees on this point, I am not aware of any bugs in the current software, which has been extensively tested both in our laboratory and in many clinical trials at Stanford and at other institutions. Please get back to me promptly if you encounter any problems with the software. My office number is (415) 852-3419. My home telephone number is (415) 965-7450. My FAX number is (415) 852-3414. My e-mail address is me.sls@forsythe.stanford.edu. In emergencies, I can usually be reached on my pager (415-723-8222, pager: 3477) or via my pocket cellular phone: 415-722-7840. Of the above, e-mail works the best.

Lastly, the computer on which STANPUMP has been developed is regularly screened for viruses. This workstation has never been infected by a virus, and STANPUMP copies obtained directly from me have never been contaminated with viral code.

The most recent copy of STANPUMP is always available on the Internet. You can get it either by anonymous FTP to pkpd.icon.palo-alto.med.va.gov, or via the WWW (e.g., Netscape, Internet Explorer) at URL: [http://pkpd.icon.palo-alto.med.va.gov](http://pkpd.icon.palo-alto.med.va.gov/).

## Additional pump drivers

Pump drivers are very difficult to develop, in part because of technical issues involving the precision and accuracy of the pumps themselves. Several pump companies are developing drivers for STANPUMP. This is being done for a variety of research and testing/evaluation purposes. Pump manufacturers interested in developing drivers for STANPUMP should contact me directly for technical assistance. Additional drivers must be developed in a manner that permits free distribution with the STANPUMP software.

## Conclusion

I welcome suggestions for improvements to STANPUMP. Other drugs or kinetic sets can be easily added. I no longer develop drivers for additional pumps, but am happy to work with individuals interested in doing this.

Thank you for your interest with STANPUMP. I hope it is a useful adjunct to your research program.

**Appendix I: Command Line Arguments**

STANPUMP can accept command line arguments for virtually every parameter affecting pump performance. If you wish, you can make a batch file to process STANPUMP in a mode you commonly use. This avoids having to go through the initial menu each time you use the program. This is especially useful if you are doing studies with STANPUMP. The command line arguments are listed below. Note that STANPUMP usually does not look for the entire argument name. Instead, it looks only at the first few characters. The minimum text required to recognize each command is listed in [brackets] following each command line argument. You may use either the full text, for clarity, or the abbreviated text for simplicity. Command line arguments may be typed in either upper or lower case. You may use as few or as many arguments as you wish. The arguments are:

simulation [sim]

Places the pump in simulation mode.

weight {number} [wei]

Sets the patient's weight. The weight must be between .01 and 300 kg. If no number is specified, the weight parameter is ignored and the user will be asked for a weight.

gender (m/f) [gen or sex]

Sets the gender as male or female.

subject (name) [sub]

Sets the subject identifier to name (whatever you type in after “sub”).

user (name) [user]

The person using STANPUMP (the answer to the “who are you?” question.

delta {number} [del]

Sets the number of seconds between pump updates. Delta must be between 10 and 60 seconds. If no number is specified, the delta parameter is ignored, and the system will default to 10 seconds.

# end (number) [end]

Forces STANPUMP to terminate after a given number of minutes. This is typically only used to do a series of simulations in batch mode, so the program can produce output of multiple runs without attendance.

slow (number) [slow]

The simulation speed of STANPUMP has two options: real time and accelerated. Typically, the accelerated simulation is as fast as the computer can process. With a Pentium class computer, “as fast as possible” can be so fast that adjustments are not possible. If “slow” is selected on the command line, the simulation is slowed down by the number given, which gives time for adjustments. The “number” controls a simple loop to waste time. Thus, the user will need to try several numbers to determine the desired simulation speed.

fast [fast]

Stanpump starts out in simulation mode at the fast (accelerated setting). “sim” may be omitted as “fast” implies simulation mode.

desired {number} [des]

Sets the desired concentration. If no number is specified, the parameter is ignored and the user will be asked for the desired concentration.

concentration {number} [con]

Sets the infusate concentration. If no number is specified, the parameter is ignored. For all drugs preprogrammed into STANPUMP, the default infusate concentration is the concentration of the undiluted drug.

file {string} [file]

Sets the output file to {string}. If no output file is specified, the command is ignored and the user will be asked for an output file.

kinetics {string} [kin]

Sets the pharmacokinetic parameters to that specified by the file {string}. If no file is specified, the command is ignored. This is the command to use to enter your own drugs or parameters into STANPUMP without recompiling the program. See below for the argument list for the pharmacokinetic input file

fentanyl [fen]

Specifies that the drug is fentanyl

May be followed by:

Hug (McClain and Hug Parameters) [hug]

Scott (Scott and Stanski Parameters) [sco]

Shafer (Shafer parameters) [sha]

alfentanil [alf]

Specifies that the drug is alfentanil

May be followed by:

Sco1 (Scott parameters, not wt adjusted) [sco1]

Sco2 (Scott parameters, weight adjusted) [sco2]

Maitre (Maitre parameters) [mai]

Hudson (Hudson parameters) [hud]

-not presently specified

Gor1 (Goresky parameters, < 1 year) [gor1]

Gor2 (Goresky parameters, 1-18 years) [gor2]

sufentanil [suf]

Specifies that the drug is sufentanil

May be followed by:

Hudson (Hudson parameters) [hud]

Bovill (Bovill parameters) [bov]

Gepts (Gepts parameters) [gep]

dexmedetomidine [dex]

Specifies that the drug is dexmedetomidine

No specific kinetic set on the command line

thiopental [thi]

Specifies that the drug is thiopental. The only PK set now available is that described by Stanski/Maitre

midazolam [mid]

Specifies that the drug is midazolam

Only 1 kinetic set in program (Greenblatt's), so no specific kinetic set on the command line.

diazepam [dia]

Specifies that the drug is diazepam

Only 1 kinetic set in program (Greenblatt's), so no specific kinetic set on the command line.

propofol [pro]

Specifies that the drug is propofol

May be followed by:

Marsh Marsh (same as Diprifusor) [mar]

BJA 67, 41-48, 1991

ped Pediatric propofol PK [ped]

Anesthesiology 80:104-122, 1994

icu Adult ICU propofol [icu]

Barr et al (Anesthesiology Abstract)

Mora Cardiopulmonary bypass PK [mora]

Schnider Schnider age-adjusted [sch]

Anesthesiology 1998

lidocaine [lido]

Specifies that the drug is lidocaine.

May be followed by:

rowland (Rowland's kinetics) [row]

vozeh (Vozeh's kinetics) [voz]

ketamine [ket]

Specifies that the drug is ketamine. You will be asked to select between human and horse pharmacokinetic parameter sets, as appropriate to the clinical situation.

methohexital [meth]

Specifies that the drug is methohexital.

May be followed by:

Hudson (Hudson/Stanski pk) [hud]

Bloom (Initial pk for M. Bloom) [blo]

etomidate [etom]

Specifies that the drug is etomidate. Only 1 kinetic set (Arden's) in program.

methadone [methadone]

Specifies that the drug is methadone. Can be followed by:

Inturissi (Inturissi pk) [in]

Schnider (Schnider pk) [sc]

pancuronium [pan]

Specifies that the drug is pancuronium. Can be followed by:

Young (Rupp, young pk) [yo]

Elderly (Rupp, elderly pk) [el]

vecuronium [vec]

Specifies that the drug is vecuronium. Can be followed by:

Young (Rupp, young pk) [yo]

Elderly (Rupp, elderly pk) [el]

atracurium [atr]

Specifies that the drug is atracurium. The only PK set in STANPUMP is that reported by Marathe and colleagues (Anesthesiology 70:752-755, 1989)

effect [eff]

Specifies to come up in effect mode.

plasma [pla]

Specifies to come up on plasma mode.

c2 [c2]

Specifies IMED C2 protocol

c2simulator [c2sim]

Specifies use of IMED C2 simulator, which annoyingly has a slightly different command set than the C2 pump it is intended to simulate!

harvard [har]

Specifies harvard pump 22

The following syringes may be specified for the harvard pump:

bd5 Becton-Dickinson 5 ml [bd5]

bd10 Becton-Dickinson 10 ml [bd10]

bd20 Becton-Dickinson 20 ml [bd20]

bd30 Becton-Dickinson 30 ml [bd30]

bd60 Becton-Dickinson 60 ml [bd60]

mj6 Monoject 6 ml [mj6]

mj12 Monoject 12 ml [mj12]

mj20 Monoject 20 ml [mj20]

mj35 Monoject 35 ml [mj35]

mj60 Monoject 60 ml [mj60]

h5 Hamilton 5ml Glass [h5]

volume {number} [vol]

Specifies volume currently in syringe

Volume ignored if no number is specified

You can also specify your own syringe type using the keyword "syringe"

syringe {name} {internal diameter} {maximum volume} [syr]

This sets a new syringe type for the harvard pump 22. The {name} is the text name for the syringe. If you want an included space or comma, then enclose the name in quotes (e.g. "New Syringe Type"). The internal diameter is the diameter of the syringe in millimeters. The volume is the maximum capacity of the syringe. All three parameters must be specified, or the syringe command line argument will be ignored.

onetype

Specifies that the syringe type, once set, will not change over the course of the study.

gibbs

Causes a brief precalculation of infusion rates prior to reading pump volume. This nearly eliminates the very small overshoot when raising concentrations caused by the delay between when the pump reads the concentration infused from the pump and when it sends out the next rate. However, it increases the size of the output file.

com1, com2, com3, or com4

Specifies that the communications port is com1, com2, com3, or com4, respectively. Com1 is assumed if no port is specified.

address

Address of the communications port. This allows for nonstandard ports to be used for the serial communication.

study [study]

Specifies Hudson Study Protocol. Should only be used by Bob Hudson.

prior [prior]

Specifies that drug was given prior to running STANPUMP. STANPUMP will ask for the details of prior administration, which will be modeled, prior to starting its own infusion.

reproduce [rep]

Specifies that STANPUMP is to reproduce a prior run. Reproduce must be followed by a file name, which is the output file (with the .DAT extension) from a previous STANPUMP run.

track [track]

STANPUMP will track a set of targets specified on a disk file. The disk file should be an ASCII file with time and targets specified. Each line should have the time, a space, tab, or comma, followed by the desired target at that time.

drg [drg]

files ending with the extension .drg contain infusion information. STANPUMP creates a .drg file for use with our PK modeling programs. STANPUMP can be instructed to follow the infusion specified within a .drg file by including the .drg command line argument, followed by the name of the file with the infusion information.

You can also create your own .drg files for use with STANPUMP. These can either be the three line .drg format used by our PK programs, or a simple 1 line format consisting of time vs infusion rate. The time is in minutes, and the infusion rate is in the default dosing units (either mg or **g, depending on the drug) per minute. A sample is given in the appendix.

debug [debug]

STANPUMP will display debugging information as it runs. Can be fairly spectacular.

quick [quick]

STANPUMP will bypass the confirmation displays during setup.

delete [delete]

STANPUMP will automatically delete old files if the name conflicts with a new file name. This bypasses the default dialogue about whether the user wants old files with the same name as new files to be deleted.

ici [ici]

STANPUMP enters the mode required for the ICI/Stuart Pharmaceuticals multicenter trial.

bard [bard]

STANPUMP will perform simulations using the maximum rates of the BARD InfusO.R. pump for fentanyl, alfentanil, sufentanil, propofol, vecuronium, and atracurium.

For example, the command line:

stanpump fentanyl hug weight 85 desired 15 harvard bd60 40 file study01

is equivalent to:

stanpump fen hug wei 85 des 15 har bd60 file study01

and will start up STANPUMP, automatically defaulting to a fentanyl infusion using McClain and Hug's pharmacokinetic parameters for an 85 kg patient, with an initial targeted plasma concentration of 15 ng/ml, using a harvard infusion pump loaded with a 60 ml Becton-Dickinson syringe. The output files will be study01.dat and study01.drg.

The command line is interpreted prior to the initial questions. After selecting the kinetics, blood levels, etc, the computer will ask for a confirmation. If you select "2" (which means you don't confirm the selections) then the computer will ignore the command line arguments and restore all default values. This allows you to correct inaccurate command lines while running the program.

**Appendix II: Output Files**

STANPUMP creates output files as it runs. The first file ends with the extension ".DAT". This file is an ASCII account of what STANPUMP did every few seconds. This file constitutes the main record of STANPUMP's activities during each study, and should be permanently stored as part of the research documentation.

Each line of the file has three numeric arguments. The first argument is a flag, the second is the time (in seconds) since the beginning of the infusion. The third argument varies depending on the flag. The interpretation of the third argument is as follows:

Flag Third Argument

1 Volume infused up to that time point

2 Rate requested from the pump (mls/hr) at that time point

3 Predicted plasma drug concentration at that time point

4 Predicted effect site concentration at that time point

Every time STANPUMP updates the pump rate, a new set of arguments is printed out.

To prepare graphs from STANPUMP, load the .DAT file into EXCEL. The fields in the .DAT files are separated by commas, so prior to opening the file, click on "Text", and "Comma" in the file open dialog box. After the file is open, sort the data by field 1 (flag), then field 2 (time, in seconds). You can then add a fourth column to convert the time from seconds to minutes, hours, days, or whatever units you wish to display. Then, prepare a graph of time vs the value (third column) for whatever portion of the data (volume, rate, plasma concentration, or effect site concentration, as indicated by the flag in column 1) that interests you.

Another way of obtaining files for making attractive graphs is to run the program DATFILES, which is also included on the installation diskette. To run the DATFILES program, type “DATFILES,” followed by the name of the .dat file, the name of an output file for the graph (any legal DOS filename), and a number indicating how compressed you want the output file to be. For example, assume the .dat file created by STANPUMP is called “mystudy.dat”. The following command would create an ASCII file appropriate for making graphs called mystudy.gra with a compression factor of 1%:

datfiles mystudy.dat mystudy.gra 1

If mystudy.gra proved to be too big, you could create a file showing the same information, but with somewhat lower resolution, using the command:

datfiles mystudy.dat mystudy.gra 5

The file “mystudy.gra” would have about 1/5th as many lines with a compression factor of 5% as the file created with a compression factor of 1%. You can experiment with the compression factor to create a file with satisfactory resolution of your study that is not so large as to be difficult to process with your graphics program.

The output file created by DATFILES (mystudy.gra in the above example) is a comma separated file organized as minutes from start of the STANPUMP study, true time, plasma concentration, effect site concentration, pump rate (mls/hr), and cumulative mls infused. It can easily be loaded into most programs as a comma delimited file. Additionally, Excel directly recognizes the date/time format.

STANPUMP also creates a file ending with the extension ".DRG". This file is a compressed infusion function which we use when using nonlinear regression of computer controlled drug delivery. The first line, "9999 0" specifies that no boluses were given (our regression software will process either boluses or infusion, with boluses listed first). Subsequent lines show a consecutive listing of infusions, starting with time on (min), time off (min), and rate (units/min). The last infusion is 9999 9999 0, which is, again, a flag to our nonlinear regression software that there are no more infusions to process.

STANPUMP creates a file with the extension ".ERR". This is a file showing errors and warnings from STANPUMP during operation. It can generally be ignored unless problems are encountered, in which case it may be quite useful.

STANPUMP creates a file with the extension ".cmm". It is a detailed record of every communication between STANPUMP and the pump. This file can also be ignored unless problems are encountered, in which case it may be useful.

STANPUMP creates a file with the extension “.pk”. This is a file that shows, first, the details of the stanpump run (subject name, drug, parameter set, infusate concentration). It then shows the details of the pharmacokinetic model used by STANPUMP for the run.

STANPUMP creates a file with the extension “.gra”. This ASCII, comma delimited file is intended for direct import into a spreadsheet program. The columns are time (minutes), clock time (day/hour/minutes/seconds), plasma concentration, and effect site concentration.

To summarize, the files which end with “.dat”, “.drg", and “.pk” should be saved, as these files will permit reconstruction of the precise dosing regimen administered to the patient. The files which end with ".err" and ".cmm" can be erased following each study, provided that no unanticipated problems arose. The “.gra” file can be used to easily construct graphs of the STANPUMP run.

**Appendix III: External Parameter File**

STANPUMP can read all of the pharmacokinetic parameters from an external file, rather than require that the parameters be compiled into the program. The file can only be accessed by a command line argument:

kinetics: {file}

where {file} is the name of the disk file. If the disk file cannot be found, the program will abort. The format for the file is shown below. Note that each item must be on its own line, and items 1, 2, and 3 may not contain imbedded spaces. If the flags are not set to 0 or 1, the results are not predictable. The usual text for species identification is "Patient", but you may put whatever you like. The disk includes a file "sample.kin" showing how this file should be structured.

Pharmacokinetic File Format:

Line Description

1 drug name

2 parameter name

3 species identification

4 units flag: (for display purposes only)

0: plasma: ng/ml

infusate: ug/ml

1: plasma: ug/ml

infusate: mg/ml

5 Effect Flag:

0 = no effect data

1 = effect data

6 Weight Scale Flag

0 = don't scale vc to weight

1 = scale vc to weight

7 infusate concentration

(in units, as above, per ml)

8 maximum permissible concentration

9 desired awakening concentration

10 maximum rate (in infusate units/kg/min)

11 vc (liters or liters/kg)

Units depend on flag 6:

0 = don't scale to weight, units = liters

1 = scale to weight, units = liters/kg

12 k10 (/minute)

13 k12 (/minute)

14 k13 (/minute)

15 k21 (/minute)

16 k31 (/minute)

17 ke0 (/minute)

Item 17 can be omitted if the effect flag = 0;

For example:

stanpump kinetics myown.kin weight 85 desired 15 harvard bd60 40 file study01

will start up STANPUMP, automatically reading in the pharmacokinetic parameters from myown.kin. As in the previous example, the weight will be set to 85 kg, with an initial targeted plasma concentration of 15, using a harvard infusion pump loaded with a 60 ml Becton-Dickinson syringe that has 40 mls of drug in it. The output file created by STANPUMP will be study01.dat.

You could also just say:

stanpump kinetics myown.kin

and STANPUMP would use the pharmacokinetics from myown.kin, but would still ask you for the weight, desired concentration, type of pump used, type of syringe, etc.

STANPUMP can easily handle drugs described by only 1 or 2 compartment models. For a 2 compartmental model, just set k13 and k31 to 0. For a 1 compartment model, also set k12 and k21 to 0. In a 1 compartment model, k10 is then the same as the elimination rate constant.

**Appendix IV: Using STANPUMP controlling files**

STANPUMP can be instructed to follow three different types of controlling files, 1) a file of times vs target concentrations, 2) a file of times vs infusion rates, and 3) the “.dat” files created by a previous run. In each case, STANPUMP is told to follow the file by means of a command line argument. For example:

1) STANPUMP follows a file of times vs target concentrations:

File: SAMPLE.TAR:

0 1

5 2

10 3

15 2

30 1

60 0

Command line:

STANPUMP track sample.tar

Example: TARGET.BAT (on the distribution disk)

In the above example, the target concentration will be 1 at time 0, 2 at 5 minutes, 3 at 10 minutes, and so on. STANPUMP continues to be responsive to the control functions between target times, so adjustments can be made if necessary.

2) STANPUMP follows a file of times vs infusion rates:

File: SAMPLE.DRG

0 25

5 50

10 75

15 100

30 0

Command line:

STANPUMP drg sample.drg

Example: DRG.BAT (on the distribution disk)

In the above example, the infusion rate will start at 25 units/min, then increase at 5 minutes to 50 units/min, then increase at 10 minutes to 75 units/min, and so on. The units of the infusion rate are whatever the default units are for the drug (either mg or g).

3) STANPUMP follows a prior STANPUMP run:

FILE: SAMPLE.DAT

1, 0, 0.000000

3, 0, 0.0000

4, 0, 0.0000

2, 0, 199.7178

1, 10, 0.554772

3, 10, 1.0000

4, 10, 0.0207

2, 10, 11.7333

1, 20, 0.587364

3, 20, 1.0000

4, 20, 0.0605

2, 20, 11.6183

... (to about 60 minutes)

Command line:

STANPUMP rep sample.dat

Example: REPRO.BAT (on the distribution disk)

In the above example, STANPUMP will reproduce a prior STANPUMP simulation, based on the file SAMPLE.DAT.

Using command line arguments and control files, STANPUMP can be used as a general purpose simulation tool for pharmacokinetic analysis of intravenous anesthetic drugs.
