# Supplementary material
Source: ML conference proceedings conference paper supplement (https://openreview.net/forum?id=3X6QlkWfHH)
Supplement: supplementary_material [file drugDefaults_global.xlsx]

## Sheet: Sheet1
Drug	Concentration Units	Bolus Units	Infusion Units	Default Units	Units	Color	Lower	Upper	Typical	MEAC	endCe	endCeText
propofol	mcg	mg	mcg/kg/min	mg	mg,mg/kg,mcg/kg/min,mg/kg/hr	#FFCC00	2.5	4	3	0	1	emergence
remifentanil	ng	mcg	mcg/kg/min	mcg/kg/min	mcg,mcg/kg,mcg/kg/min	#0000C0	0.8	2	1.2	1	1	ventilation
fentanyl	ng	mcg	mcg/kg/hr	mcg	mcg,mcg/kg,mcg/kg/hr	#0491E2	0.48	1.2	0.72	0.6	0.6	ventilation
alfentanil	ng	mcg	mcg/kg/hr	mcg	mcg,mcg/kg,mcg/kg/hr	#0491E2	31.2	78	46.8	39	39	ventilation
sufentanil	ng	mcg	mcg/kg/hr	mcg	mcg,mcg/kg,mcg/kg/hr	#0491E2	0.0448	0.112	0.0672	0.056	0.056	ventilation
morphine	mcg	mg	mg/hr	mg	mg,mg/hr	#032FED	0.0064	0.016	0.0096	0.008	0.008	ventilation
pethidine	mcg	mg	mg/hr	mg	mg,mg/hr	#5155FF	0.2	0.5	0.3	0.25	0.25	ventilation
hydromorphone	ng	mg	mg/hr	mg	mg,mg/kg,mg/hr,mg/kg/hr,mg PO,mg IM,mg IN	#032FED	1.2	3	1.8	1.5	1.5	ventilation
methadone	mcg	mg	mg/hr	mg	mg,mg/hr	#71C5E8	0.048	0.12	0.072	0.06	0.06	ventilation
ketamine	mcg	mg	mg/hr	mg	mg,mg/kg,mg/hr,mg/kg/hr	#FFCC00	0.1	0.16	0.12	0	0.1	emergence
dexmedetomidine	ng	mcg	mcg/kg/hr	mcg/kg/hr	mcg,mcg/kg,mcg/hr,mcg/kg/hr	#791AEE	0.4	0.8	10	0	0.4	emerence
midazolam	mcg	mg	mg/hr	mg	mg,mg/kg,mg/hr	#E36C0A	0.04	0.12	0.1	0	0.04	wakefulness
etomidate	mcg	mg	mg/kg/min	mg	mg,mg/kg/min	#FFCC00	0.4	0.8	0.5	0	0.4	emergence
lidocaine	mcg	mg	mg/hr	mg	mg,mg/hr	#B7AE7F	0.5	1.5	1	0	0.5	emergence
rocuronium	mcg	mg	mg/kg/hr	mg	mg,mg/kg/hr	#F9423A	1	2.2	1.5	0	1	reversable
naloxone	ng	mcg	mcg/min	mcg	mcg,mcg/kg,mg,mg/kg,mcg/min,mcg/kg/min,mg/min,mg/kg/min	#404040	0	0	0	0	1	no effect
oxytocin	ng	mcg	mcg/min	mcg	mcg,mg,mg/kg,mcg/min	#008F7D	0.05	0.2	0.1	0	0.05	no effect
oxycodone	ng			mg PO	mg PO	#032FED	10	20	14	12	10	ventilation
