# Supplementary material
Source: ML conference proceedings conference paper supplement (https://openreview.net/forum?id=3X6QlkWfHH)
Supplement: supplementary_material [file eventDefaults.xlsx]

## Sheet: Sheet1
Event	Color
Start	blue
Timeout	blue
Induction	green
Intubation	green
Extubation	green
Emergence	green
End	blue
CPB Start	#FF40FF
CPB36	#d232f2
CPB35	#a828e8
CPB34	#7e1ede
CPB33	#5414d4
CPB32	#2a0aca
CPB31	#181CAE
CPB End	brown
Clamp On	red
Clamp Off	brown
Tourniquet On	red
Tourniquet Off	brown
Other	orange
Add Events	black
