# Supplementary material
Source: ML conference proceedings conference paper supplement (https://openreview.net/forum?id=3X6QlkWfHH)
Supplement: supplementary_material [file PlotTable.xlsx]

## Sheet: Sheet 1
Drug
